# Supplementary material for: The Text-mining based PubChem Bioassay neighboring analysis
Source: Springer Nature journal article supplement (doi:10.1186/1471-2105-11-549), 2010-11-08

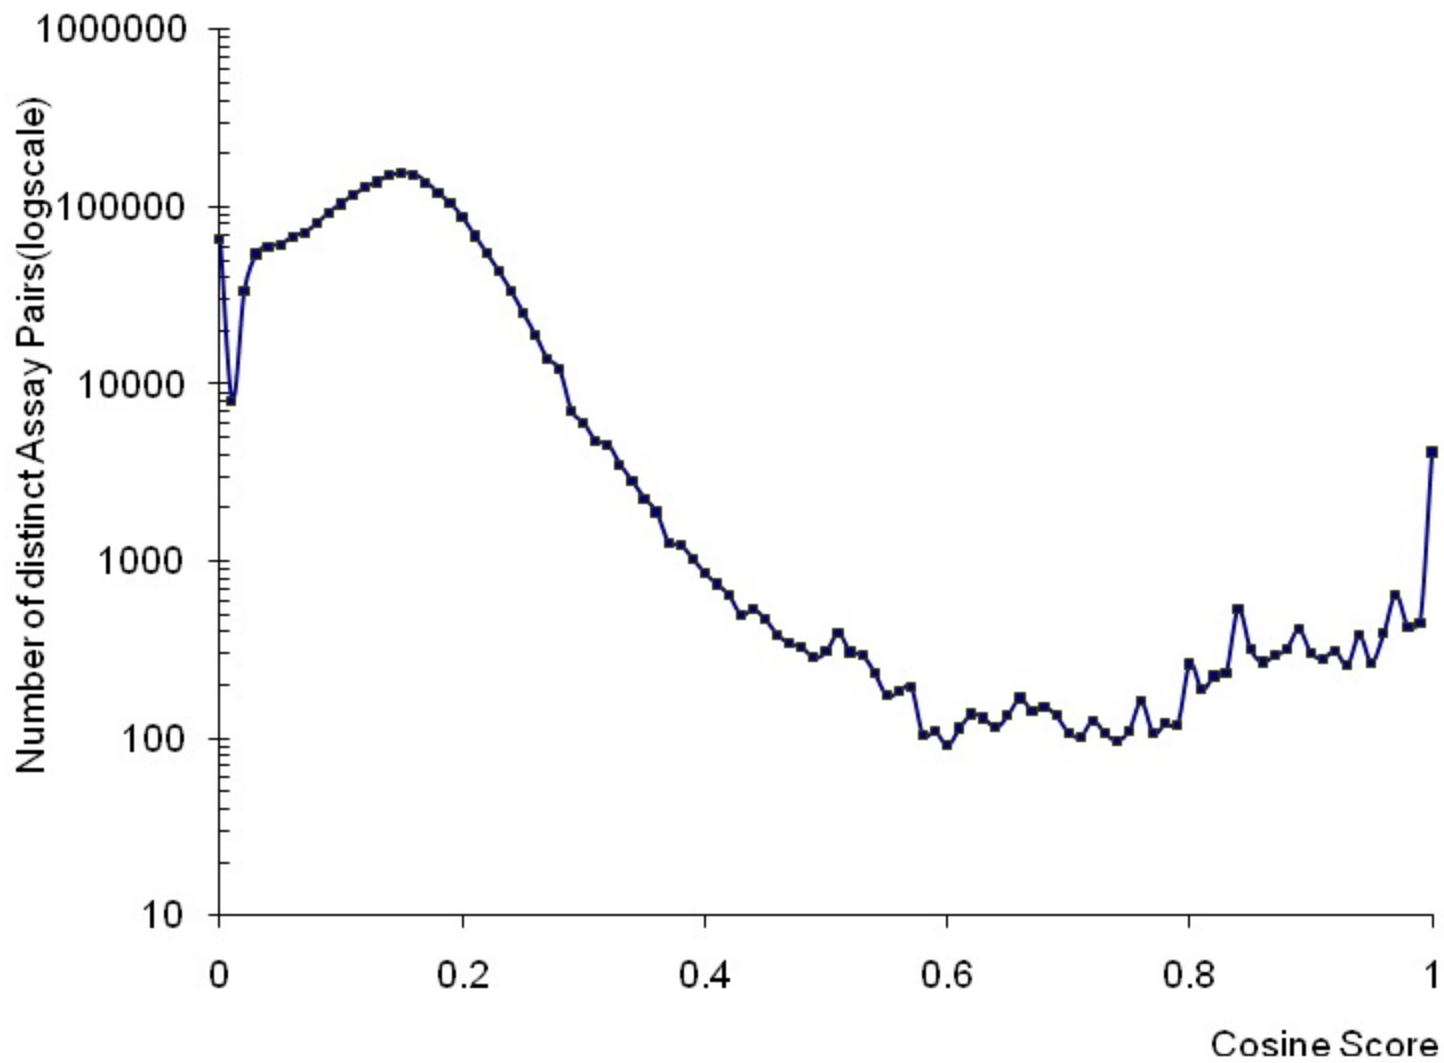

Supplement: 12859_2010_4132_MOESM1_ESM.pdf [file 12859_2010_4132_MOESM1_ESM.pdf]
